# Supplementary material for: Charge Carrier Mobility Improvement in Diketopyrrolopyrrole Block-Copolymers by Shear Coating
Source: MDPI journal article supplement (doi:10.3390/polym13091435), 2021-04-29
Supplement: s1 [file s1]

Type of the Paper (Article, Review, Communication, etc.)

## Supplementary Materials

# Charge carrier mobility improvement in diketopyrrolopyrrole block-copolymers by shear coating

Kristina Ditte<sup>1,2</sup>, Nataliya Kiriy<sup>1</sup>, Jonathan Perez<sup>3,4</sup>, Mike Hambsch<sup>3</sup>, Stefan C. B. Mannsfeld<sup>3</sup>, Yulia Krupskaya<sup>4</sup>, Ramesh Maragani<sup>5</sup>, Brigitte Voit<sup>1,2</sup>, and Franziska Lissel<sup>1,2,6\*</sup>

<sup>1</sup> Leibniz-Institut für Polymerforschung Dresden e.V., Hohe Straße 6, Dresden 01069, Germany; [ditte@ipfdd.de](mailto:ditte@ipfdd.de) (K.D.), [kiriy-nataliya@ipfdd.de](mailto:kiriy-nataliya@ipfdd.de) (N.K.)

<sup>2</sup> Faculty of Chemistry and Food Chemistry, Technische Universität Dresden, Dresden 01062, Germany

<sup>3</sup> Center for Advancing Electronics Dresden and Faculty of Electrical and Computer Engineering, Technische Universität Dresden, Helmholtzstraße 18, Dresden 01069, Germany; [mike.hambsch@tu-dresden.de](mailto:mike.hambsch@tu-dresden.de) (M.H.), [stefan.mannsfeld@tu-dresden.de](mailto:stefan.mannsfeld@tu-dresden.de) (S.C.B.M.)

<sup>4</sup> Leibniz Institute for Solid State and Materials Research, Helmholtzstraße 20, Dresden 01069, Germany; [jonathan.perez\\_andrade1@mailbox.tu-dresden.de](mailto:jonathan.perez_andrade1@mailbox.tu-dresden.de) (J.P.), [y.krupskaya@ifw-dresden.de](mailto:y.krupskaya@ifw-dresden.de) (Y.K.)

<sup>5</sup> Martin-Luther-Universität Halle-Wittenberg, Naturwissenschaftliche Fakultät II, Von-Danckelmann-Platz 4, 06120 Halle (Saale), Germany; [ramesh.maragani@chemie.uni-halle.de](mailto:ramesh.maragani@chemie.uni-halle.de) (R.M.)

<sup>6</sup> Institute of Organic Chemistry and Macromolecular Chemistry, Friedrich Schiller University Jena, Humboldtstr. 10, 07743 Jena, Germany

\* Correspondence: [lissel@ipfdd.de](mailto:lissel@ipfdd.de) (F.L.)

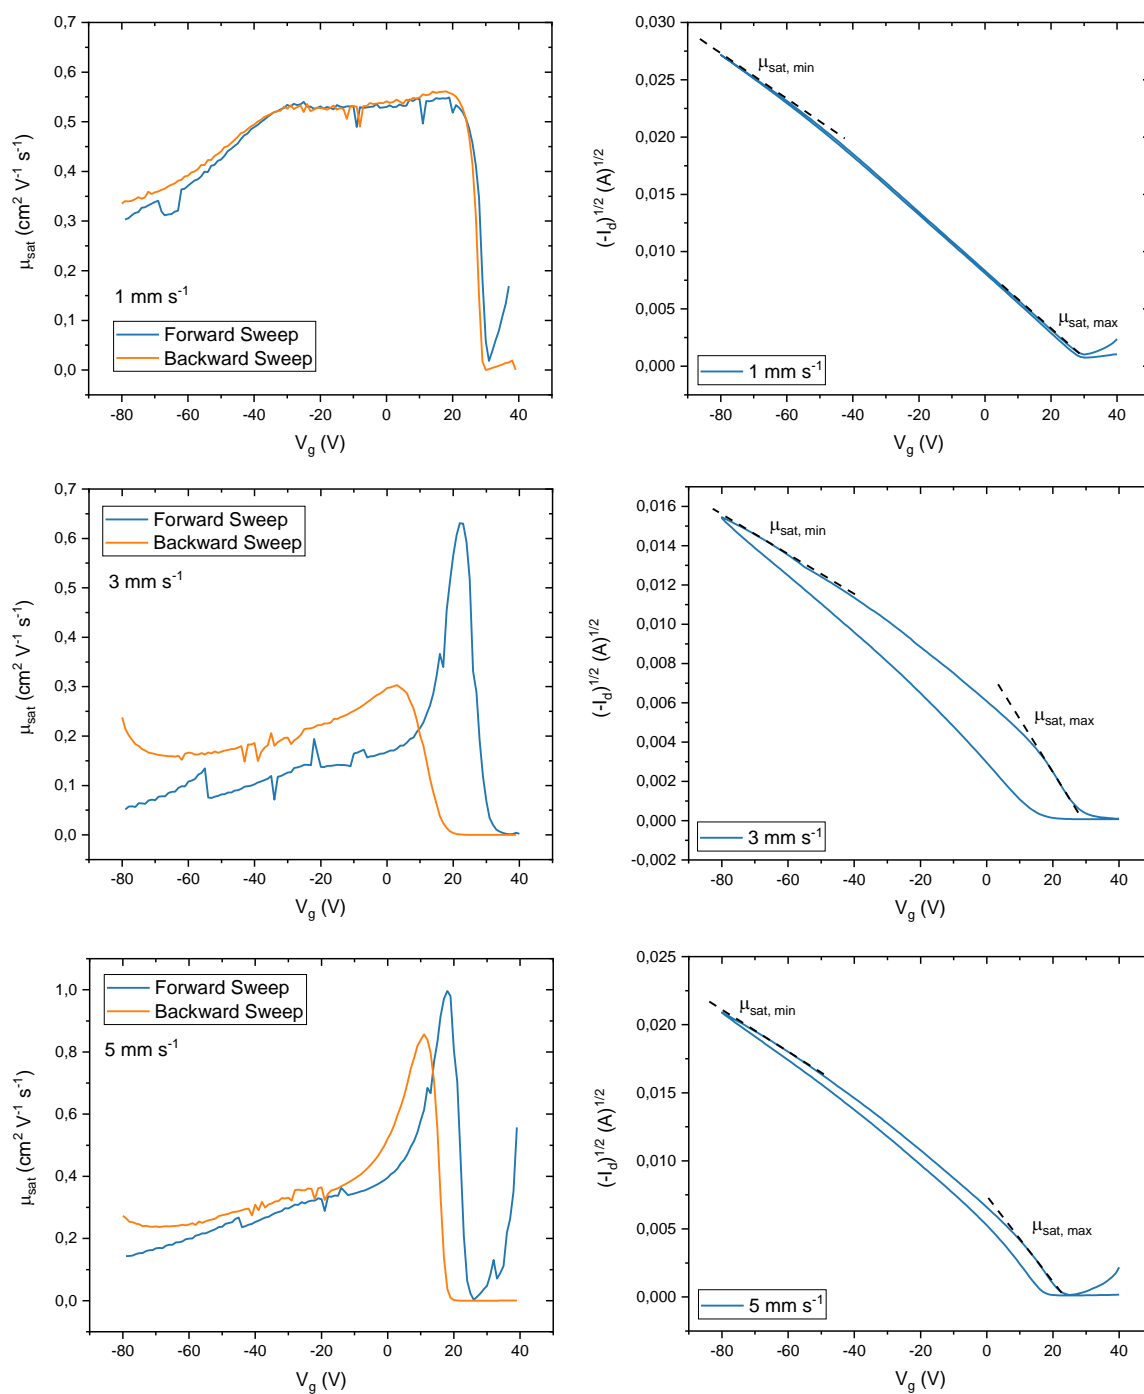

**Figure S1.** Characteristics of the reference polymer (0 wt% PDMS content) at different shear speeds (from top to bottom: 1 / 3 / 5 mm s<sup>-1</sup>). *Left side:* gate-voltage dependent saturation mobility. *Right side:* non-linear square root of the transfer characteristic ( $V_{\text{sd}} = -80$  V). The black dashed lines indicate the different gate voltage dependent mobility regimes;  $\mu_{\text{sat, max}}$  is the mobility at gate voltage close to threshold voltage and  $\mu_{\text{sat, min}}$  is the mobility at high gate voltage (-60 V to -80 V).

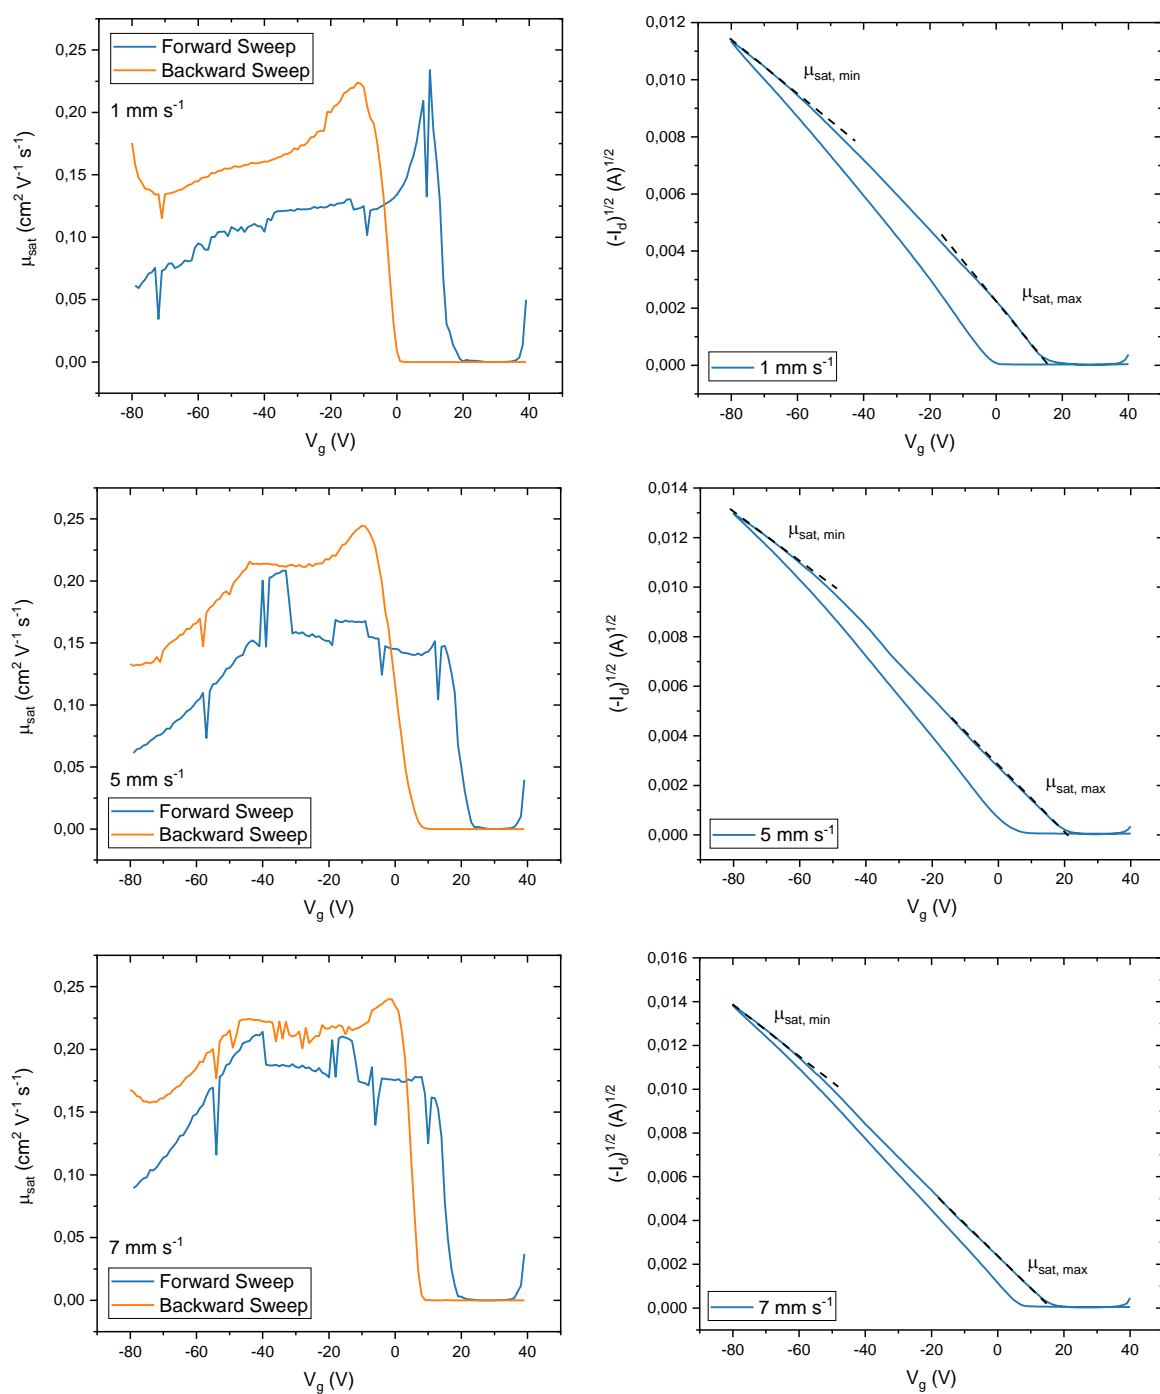

**Figure S2.** Characteristics of the TBC with 24 wt% PDMS content at different shear speeds (from top to bottom: 1 / 5 / 7 mm s<sup>-1</sup>). *Left side:* gate-voltage dependent saturation mobility. *Right side:* non-linear square root of the transfer characteristic ( $V_{\text{sd}} = -80$  V). The black dashed lines indicate the different gate voltage dependent mobility regimes;  $\mu_{\text{sat, max}}$  is the mobility at gate voltage close to threshold voltage and  $\mu_{\text{sat, min}}$  is the mobility at high gate voltage (-60 V to -80 V).

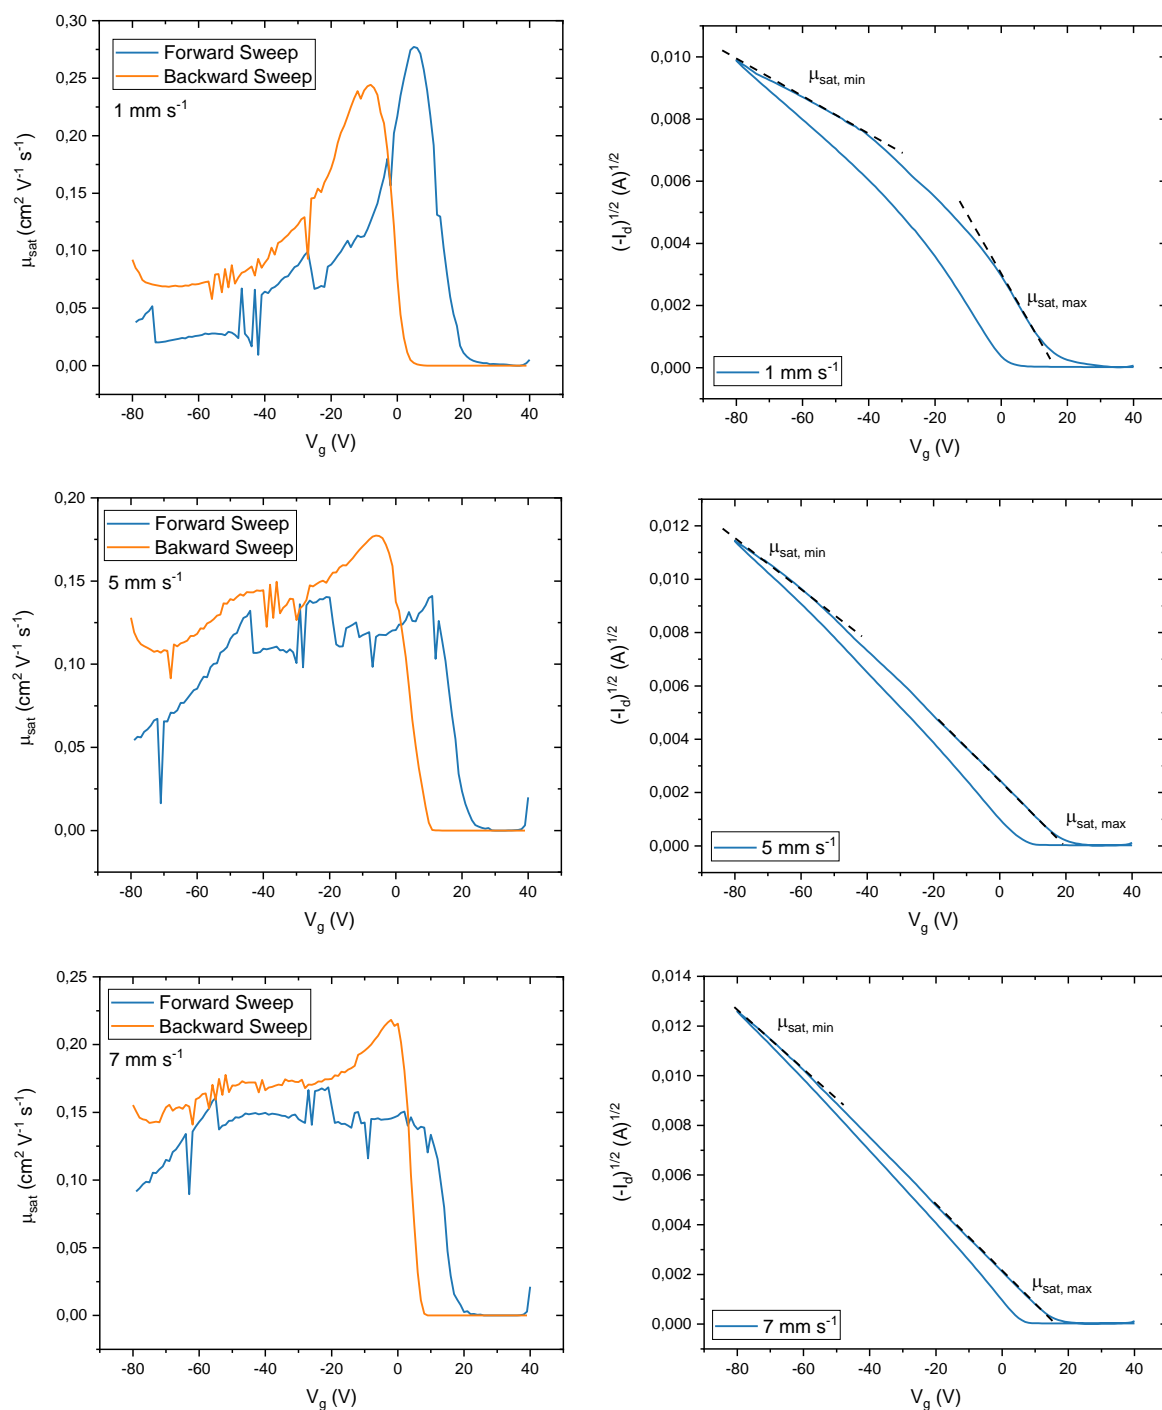

**Figure S3.** Characteristics of the TBC with 37 wt% PDMS content at different shear speeds (from top to bottom: 1 / 5 / 7 mm s<sup>-1</sup>). *Left side:* gate-voltage dependent saturation mobility. *Right side:* non-linear square root of the transfer characteristic ( $V_{sd} = -80$  V). The black dashed lines indicate the different gate voltage dependent mobility regimes;  $\mu_{sat, max}$  is the mobility at gate voltage close to threshold voltage and  $\mu_{sat, min}$  is the mobility at high gate voltage (-60 V to -80 V).

**Table S1.** Summarized  $\mu_{\text{sat,max}}$  and  $\mu_{\text{sat,min}}$  for the studied polymers with different wt% of elastomeric PDMS (0, 24 and 37 wt% PDMS) sheared from 0.5 to 10  $\text{mm s}^{-1}$ . The data is obtained from 4 measurements on at least 2 different substrates at each shear speed.

| Shear speed, $\text{mm s}^{-1}$ | 0 wt% PDMS                                                           |                                                                      | 24 wt% PDMS                                                          |                                                                      | 37 wt% PDMS                                                          |                                                                      |
|---------------------------------|----------------------------------------------------------------------|----------------------------------------------------------------------|----------------------------------------------------------------------|----------------------------------------------------------------------|----------------------------------------------------------------------|----------------------------------------------------------------------|
|                                 | $\mu_{\text{sat,max}}$ , $\text{cm}^2 \text{ V}^{-1} \text{ s}^{-1}$ | $\mu_{\text{sat,min}}$ , $\text{cm}^2 \text{ V}^{-1} \text{ s}^{-1}$ | $\mu_{\text{sat,max}}$ , $\text{cm}^2 \text{ V}^{-1} \text{ s}^{-1}$ | $\mu_{\text{sat,min}}$ , $\text{cm}^2 \text{ V}^{-1} \text{ s}^{-1}$ | $\mu_{\text{sat,max}}$ , $\text{cm}^2 \text{ V}^{-1} \text{ s}^{-1}$ | $\mu_{\text{sat,min}}$ , $\text{cm}^2 \text{ V}^{-1} \text{ s}^{-1}$ |
| 0.5                             | 0.31±0.01                                                            | 0.18±0.01                                                            | 0.04±0.02                                                            | 0.03±0.01                                                            | 0.07±0.02                                                            | 0.03±0.01                                                            |
| 1                               | 0.58±0.17                                                            | 0.31±0.05                                                            | 0.12±0.05                                                            | 0.07±0.02                                                            | 0.13±0.03                                                            | 0.04±0.01                                                            |
| 1.5                             | 0.31±0.07                                                            | 0.10±0.02                                                            | 0.17±0.01                                                            | 0.10±0.02                                                            | 0.08±0.01                                                            | 0.05±0.01                                                            |
| 2                               | 0.41±0.06                                                            | 0.05±0.01                                                            | 0.18±0.01                                                            | 0.11±0.01                                                            | 0.08±0.01                                                            | 0.06±0.01                                                            |
| 3                               | 0.29±0.13                                                            |                                                                      | 0.16±0.01                                                            | 0.10±0.01                                                            | 0.14±0.02                                                            | 0.06±0.01                                                            |
| 4                               | 0.42±0.10                                                            | 0.11±0.01                                                            | 0.19±0.02                                                            | 0.10±0.01                                                            | 0.15±0.01                                                            | 0.06±0.01                                                            |
| 5                               | 0.40±0.10                                                            | 0.16±0.02                                                            | 0.16±0.01                                                            | 0.11±0.03                                                            | 0.12±0.01                                                            | 0.07±0.01                                                            |
| 6                               | -                                                                    | -                                                                    | 0.14±0.01                                                            | 0.10±0.01                                                            | 0.12±0.01                                                            | 0.08±0.01                                                            |
| 7                               | -                                                                    | -                                                                    | 0.19±0.01                                                            | 0.11±0.01                                                            | 0.15±0.02                                                            | 0.11±0.01                                                            |
| 8                               | -                                                                    | -                                                                    | 0.16±0.01                                                            | 0.11±0.01                                                            | 0.20±0.01                                                            | 0.10±0.01                                                            |
| 10                              | -                                                                    | -                                                                    | 0.06±0.01                                                            | 0.03±0.01                                                            | 0.16±0.01                                                            | 0.11±0.01                                                            |

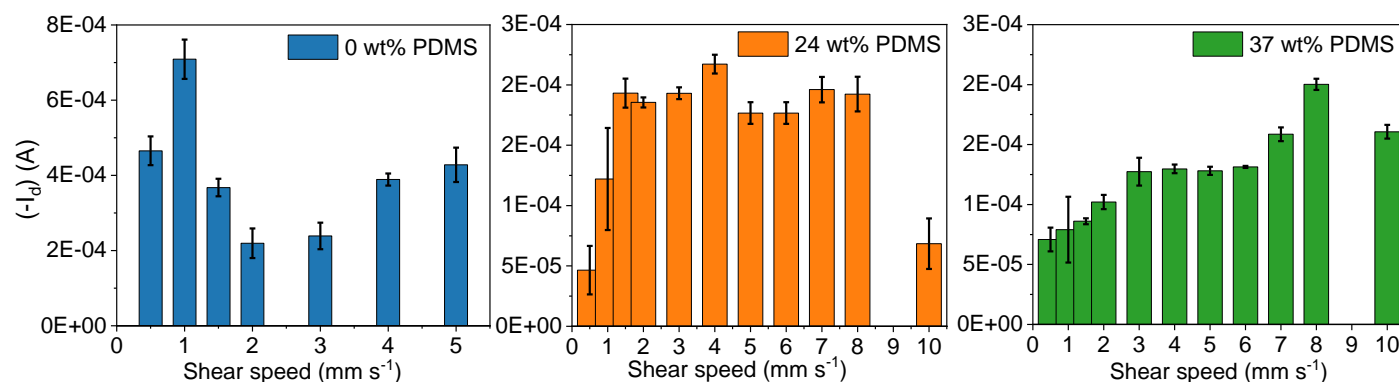

**Figure S4.** The relationship of drain current at  $V_g = -80\text{V}$  to the shear speed. The data is obtained from 4 measurements on at least 2 different substrates at each shear speed.

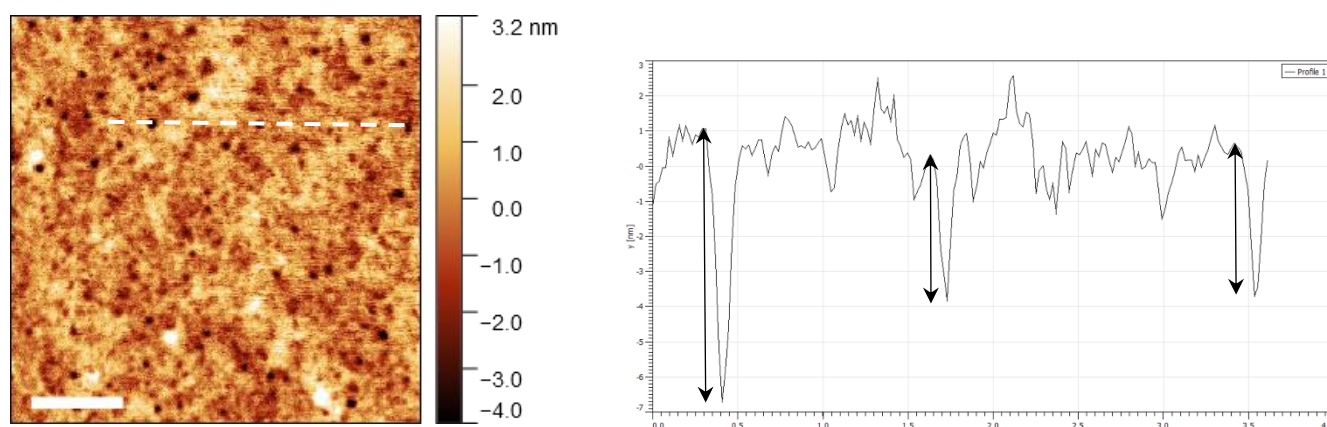

**Figure S5.** (left) AFM height image of a film of the TBC with 24 wt% PDMS deposited at 10 mm s<sup>-1</sup> shear speed, the scale bar denotes 1  $\mu$ m; (right) cross-section of the same image, the arrows indicate the presence of holes in the film after the deposition.

**Table S2.** The roughness of films of the studied polymers with different wt% of elastomeric PDMS (0, 24 and 37 wt% PDMS) sheared at different speeds.

| Shear speed, mm s <sup>-1</sup> | RMS (R <sub>q</sub> ), nm |                                 |             |
|---------------------------------|---------------------------|---------------------------------|-------------|
|                                 | 0 wt% PDMS                | 24 wt% PDMS                     | 37 wt% PDMS |
| 1                               | 1.10                      | 0.75                            | 0.67        |
| 1.5                             | 0.85                      | 0.74                            | 0.67        |
| 3                               | 0.78                      | 0.75                            | 0.65        |
| 5                               | 0.74                      | 0.72                            | 0.63        |
| 7                               | -                         | 0.70                            | 0.64        |
| 10                              | -                         | 1.00 (due to presence of holes) | 0.65        |

**Table S3.** GIWAXS spacing parameters for thin films of the studied polymers with different wt% of elastomeric PDMS (0, 24 and 37 wt% PDMS) sheared at different speeds.

|          |        | $\pi$ - $\pi$ Stacking |                                |                      |                  | Lamellar Packing            |                      |                  |
|----------|--------|------------------------|--------------------------------|----------------------|------------------|-----------------------------|----------------------|------------------|
|          |        | Shearing direction     | $Q_{xy}$ ( $\text{\AA}^{-1}$ ) | $d$ ( $\text{\AA}$ ) | Coherence length | $Q_z$ ( $\text{\AA}^{-1}$ ) | $d$ ( $\text{\AA}$ ) | Coherence length |
| 0% PDMS  | 1 mm/s | Parallel               | 1.68                           | 3.75                 | 1.57             | 0.34                        | 18.63                | 105.40           |
|          |        | Perpendicular          | 1.68                           | 3.74                 | 1.58             | 0.34                        | 18.73                | 121.20           |
|          | 5 mm/s | Parallel               | 1.67                           | 3.76                 | 1.57             | 0.34                        | 18.59                | 121.20           |
|          |        | Perpendicular          | 1.67                           | 3.76                 | 1.57             | 0.34                        | 18.72                | 121.70           |
| 24% PDMS | 1 mm/s | Parallel               | 1.69                           | 3.72                 | 1.59             | 0.33                        | 19.06                | 102.30           |
|          |        | Perpendicular          | 1.69                           | 3.71                 | 1.59             | 0.33                        | 19.04                | 92.23            |
|          | 5 mm/s | Parallel               | 1.69                           | 3.72                 | 1.59             | 0.33                        | 18.93                | 84.68            |
|          |        | Perpendicular          | 1.69                           | 3.71                 | 1.59             | 0.33                        | 18.93                | 88.23            |
|          | 7 mm/s | Parallel               | 1.69                           | 3.71                 | 1.59             | 0.33                        | 18.97                | 94.14            |
|          |        | Perpendicular          | 1.69                           | 3.71                 | 1.59             | 0.33                        | 19.04                | 102.47           |
| 37% PDMS | 1 mm/s | Parallel               | 1.69                           | 3.72                 | 1.59             | 0.33                        | 19.07                | 101.59           |
|          |        | Perpendicular          | 1.69                           | 3.72                 | 1.59             | 0.33                        | 19.01                | 86.42            |
|          | 5 mm/s | Parallel               | 1.69                           | 3.71                 | 1.59             | 0.33                        | 19.01                | 100.72           |
|          |        | Perpendicular          | 1.68                           | 3.73                 | 1.58             | 0.33                        | 19.05                | 100.04           |
|          | 7 mm/s | Parallel               | 1.69                           | 3.72                 | 1.59             | 0.33                        | 19.03                | 89.43            |
|          |        | Perpendicular          | 1.69                           | 3.71                 | 1.59             | 0.33                        | 18.91                | 71.11            |
